# Supplementary material
Source: PubMed Central journal article supplement (PMC556403)
Supplement: 7600600s1.pdf [file 7600600s1.pdf]

## Sup\_1.

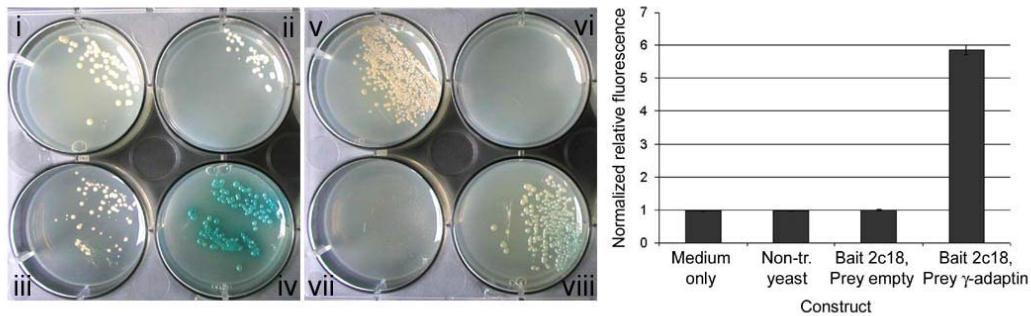

### Interaction of 2c18 with $\gamma$ 1-adaptin.

Yeast two-hybrid analysis of the interaction between 2c18 and  $\gamma$ 1-adaptin. Yeast cells were co-transformed with bait vectors containing 2c18 (aa 1-151) and prey vectors containing  $\gamma$ 1-adaptin (aa 253-822) (left panel) or bait vectors containing 2c18 (aa 1-151) and empty prey vectors (middle panel). These were streaked on media selecting for growth (wells i and v), activation of the His3 reporter (wells ii and vi), His3 and Ade2 reporters (wells iii and vii) and production of  $\alpha$ -galactosidase (wells iv and viii).

The reporters were only activated in the presence of the both 2c18 and  $\gamma$ 1-adaptin.

The strength of interaction was also measured in a fluorometric assay employing an oxygen sensing fluorophore only activated under conditions of yeast cell growth.

Growth was only detected in those wells where the cells had been transformed with both the 2c18 and  $\gamma$ 1-adaptin constructs.
