# Supplementary material
Source: PubMed Central journal article supplement (PMC556403)
Supplement: 7600600s2.pdf [file 7600600s2.pdf]

## Sup\_2.

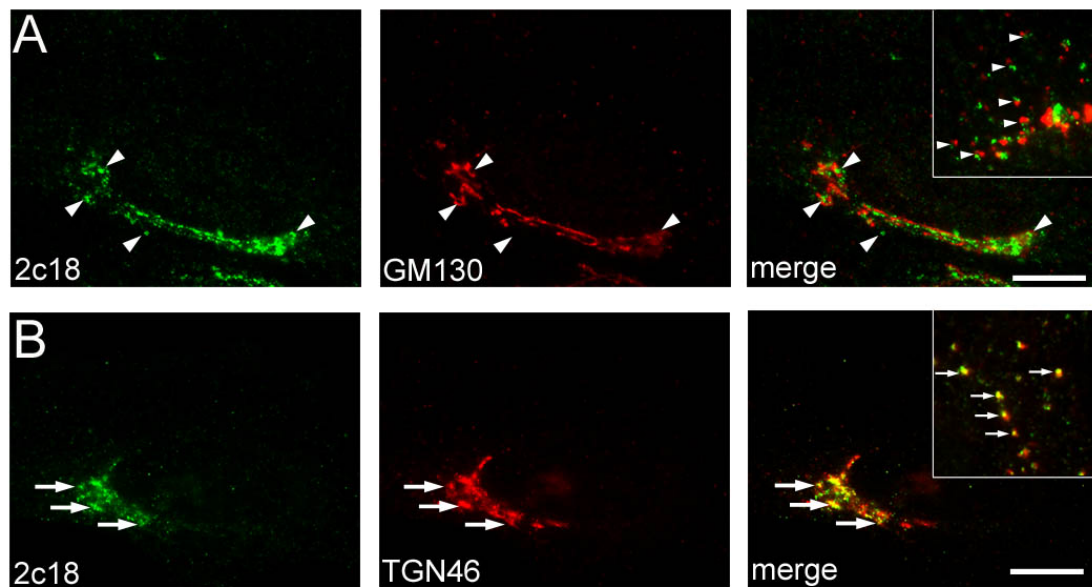

### Co-localization of 2c18 with GM130 and TGN46.

(A) and (B) Immunofluorescence analysis of endogenous 2c18 in Vero cells after fixation and immunostaining. Shown are double-stainings of 2c18 with the *cis* Golgi marker GM130 (A), and the *trans* Golgi marker TGN46 (B). The insets show cells after 2 h nocodazole (20  $\mu\text{g/ml}$ ) treatment stained for 2c18 in green and GM130 or TGN46 in red. Arrows mark co-localizing structures; arrowheads mark those which do not co-localize. No apparent overlap in the staining for GM130 is seen. In contrast, TGN46 and 2c18 show many overlapping structures in the juxta-nuclear region. Bars represent 10  $\mu\text{m}$ .
