# Supplementary material
Source: PubMed Central journal article supplement (PMC556403)
Supplement: 7600600s3.pdf [file 7600600s3.pdf]

### Sup\_3.

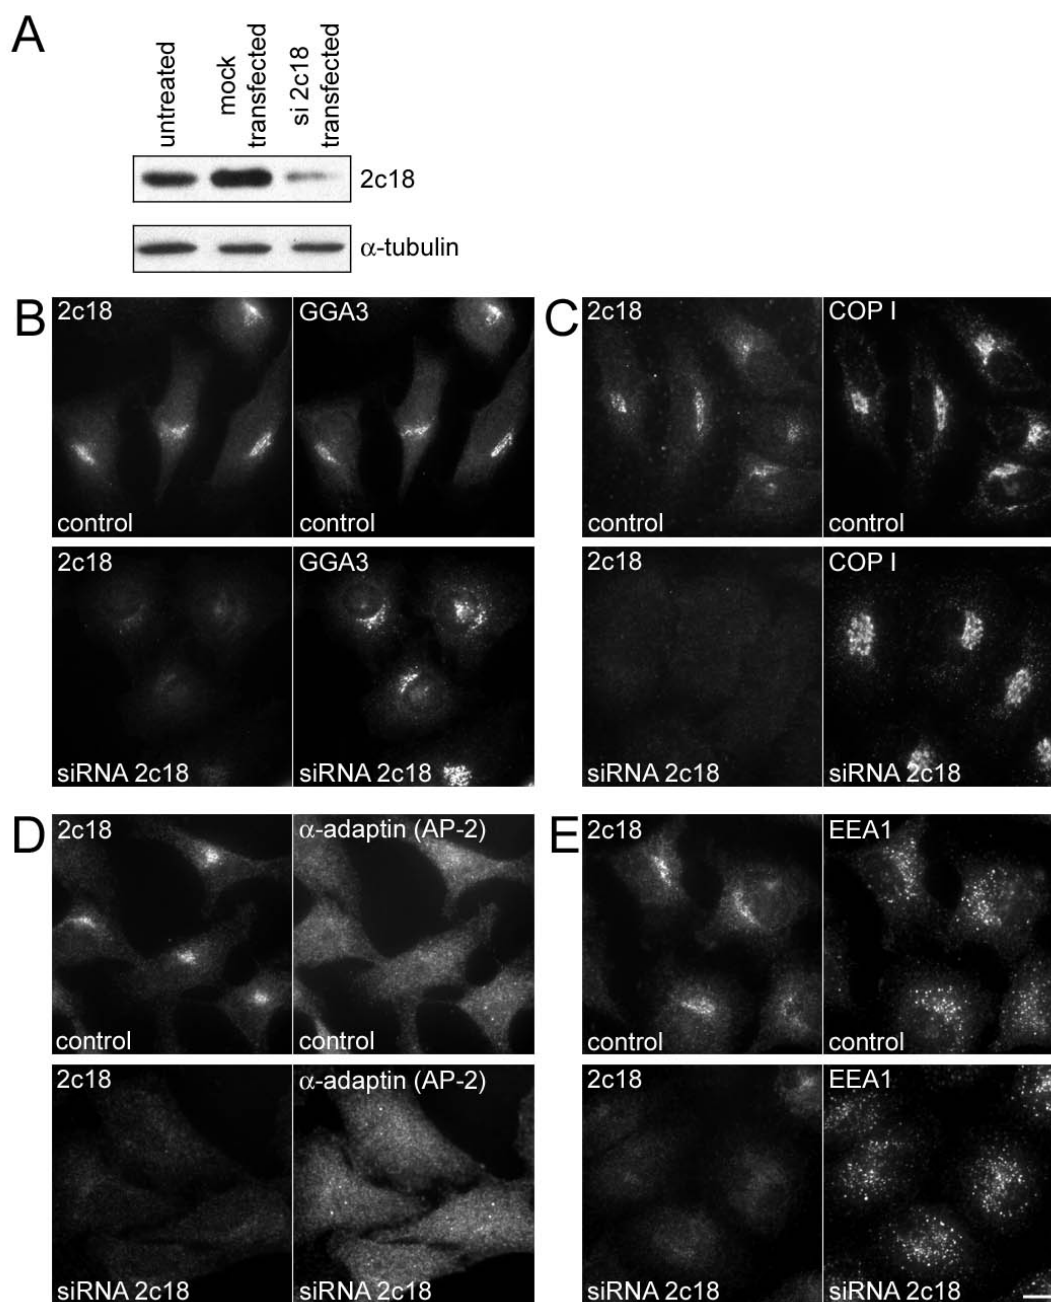

#### Downregulation of 2c18 using siRNA oligonucleotides.

(A) - (E) HeLa cells were treated with siRNA oligonucleotides as described in Materials and Methods. (A) Protein extracts were from these cells were subjected to SDS-PAGE and Western blotting for 2c18 and  $\alpha$ -tubulin. Oligonucleotides against 2c18 mRNA reduced the levels of 2c18 protein by greater than 80% compared to controls. (B) - (E) Cells were fixed and immunostained for 2c18, GGA3, COPI ( $\beta$ '-

COP), AP-2 ( $\alpha$ -adaptin) and EEA1. In all cases the appearance of these markers was unaffected compared to mock-transfected control cells. Bar represents 10  $\mu$ m.
