# Supplementary material
Source: PubMed Central journal article supplement (PMC556403)
Supplement: 7600600s4.pdf [file 7600600s4.pdf]

## Sup\_4.

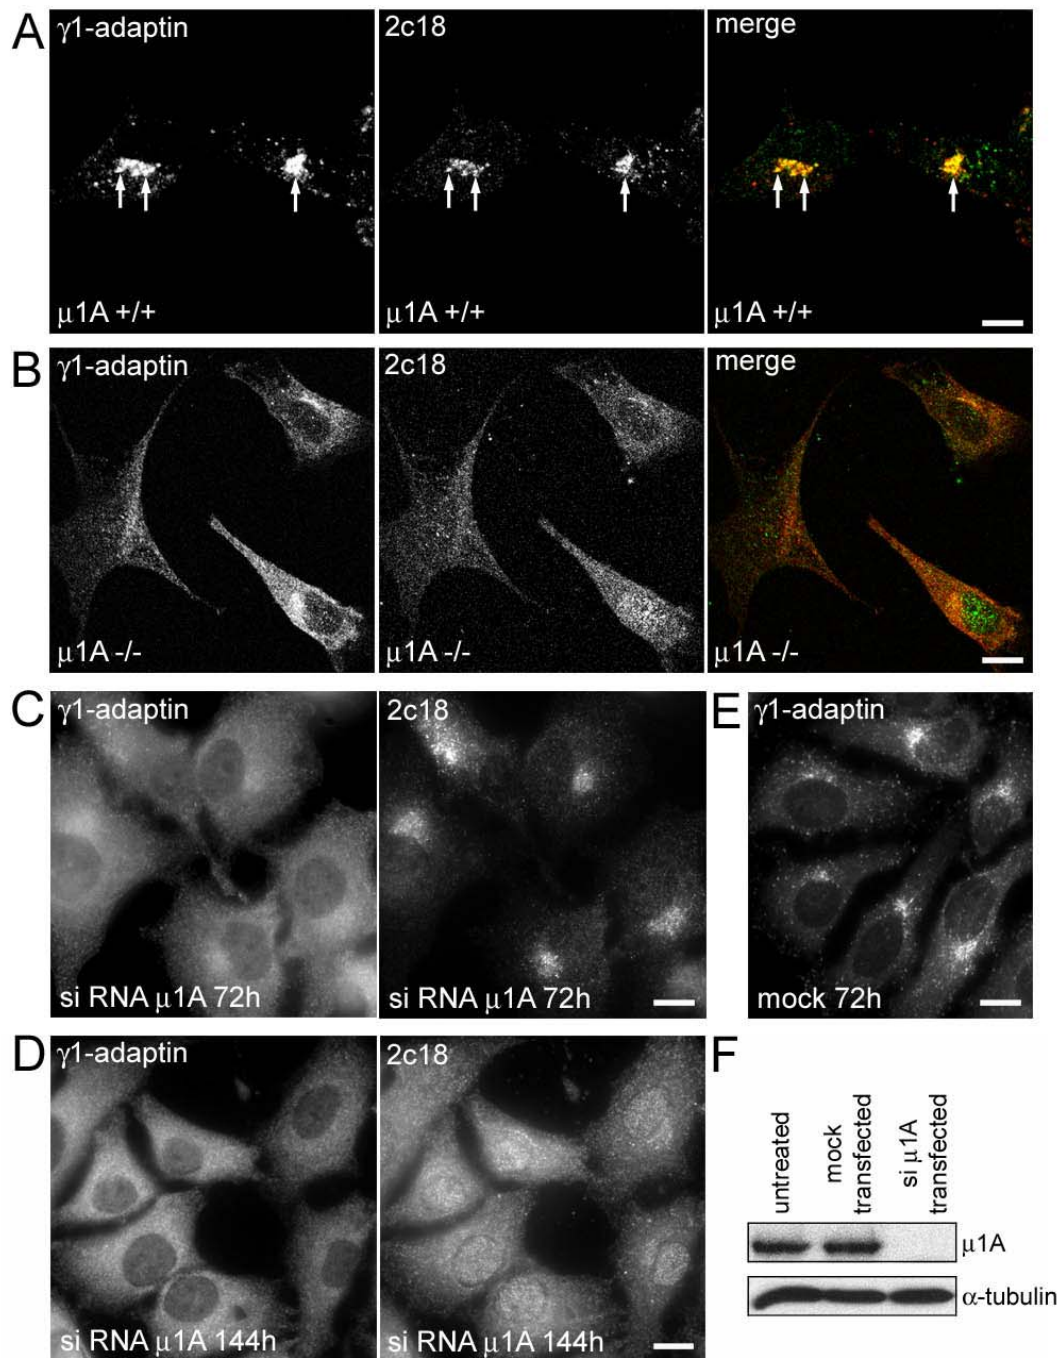

### Localization of 2c18 and $\gamma$ 1-adaptin.

(A) and (B) Mouse fibroblast cells were immunostained for endogenous  $\gamma$ 1-adaptin (left panels) and 2c18 (middle panels). Co-localizing structures are marked by arrows.

(B)  $\mu$ 1A-deficient mouse fibroblasts show that 2c18 loses its juxta-nuclear staining,

and similar to  $\gamma$ 1-adaptin appears more dispersed throughout the cytoplasm. (C) and (D) HeLa cells were treated with siRNA oligonucleotides against  $\mu$ 1A-adaptin for 72 h (C) and for 144 h (D), then immunostained for  $\gamma$ 1-adaptin and 2c18, and show that 2c18 loses its juxta-nuclear staining under these conditions after  $\gamma$ 1-adaptin. (E) HeLa cells were mock transfected for 72 h, then immunostained for  $\gamma$ 1-adaptin. Bars represent 10  $\mu$ m. (F) Protein extracts from the cells in (D) were analyzed by SDS-PAGE and Western blotting.
