# Supplementary material
Source: PubMed Central journal article supplement (PMC556403)
Supplement: 7600600s6.pdf [file 7600600s6.pdf]

**Supplementary Video.**

**Timelapse video of GFP-tagged 2c18.**

Vero cells were transfected with GFP-tagged 2c18 and imaged on a Perkin Elmer spinning disk confocal microscope 18 h thereafter. Images were acquired for 3 min at 1 sec intervals and the image sequence was assembled into a QuickTime video at 5 frames per second using ImageJ.
